# Supplementary material for: Association between CHADS2, CHA2DS2-VASc, ATRIA, and Essen Stroke Risk Scores and Unsuccessful Recanalization after Endovascular Thrombectomy in Acute Ischemic Stroke Patients
Source: MDPI journal article supplement (doi:10.3390/jcm11010274), 2022-01-05
Supplement: s1 [file s1]

**Table S1.** Univariate logistic regression analysis of the risk of an unsuccessful recanalization.

| Variables                                               | Unadjusted          |         |
|---------------------------------------------------------|---------------------|---------|
|                                                         | OR (95% CI)         | p-value |
| Age, per-1-year increase,                               | 1.019 (1.000-1.039) | 0.047   |
| Female sex                                              | 1.207 (0.766-1.902) | 0.417   |
| BMI, per-1-kg/m <sup>2</sup> increase                   | 0.980 (0.035-0.927) | 0.466   |
| <b>Vascular risk factors</b>                            |                     |         |
| Hypertension                                            | 1.557 (0.879–2.756) | 0.128   |
| Diabetes mellitus                                       | 2.088 (1.279-3.407) | 0.003   |
| Hypercholesterolemia                                    | 0.875 (0.552–1.389) | 0.572   |
| Current smoking                                         | 1.427 (0.806–2.527) | 0.223   |
| eGFR < 60 mL/min                                        | 1.448 (0.917-2.287) | 0.113   |
| <b>Comorbidities</b>                                    |                     |         |
| Atrial fibrillation                                     | 1.168 (0.739–1.844) | 0.506   |
| Coronary disease                                        | 0.470 (0.263-0.838) | 0.011   |
| Peripheral artery disease                               | 2.560 (0.892-7.114) | 0.121   |
| Previous infarction                                     | 1.122 (0.663-1.897) | 0.669   |
| Previous hemorrhage                                     | 1.625 (0.666-3.967) | 0.286   |
| <b>Medication before admission</b>                      |                     |         |
| Prior antiplatelet therapy                              | 1.042 (0.640-1.698) | 0.868   |
| Prior anticoagulant therapy                             | 0.733 (0.387-1.386) | 0.339   |
| Prior statin therapy                                    | 0.639 (0.376-1.086) | 0.108   |
| Initial NIHSS score, per-1-score increase               | 1.040 (1.004-1.077) | 0.031   |
| <b>Treatment</b>                                        |                     |         |
| tPA                                                     |                     |         |
| -IA thrombolysis without IV tPA                         | Reference           |         |
| -Combined IV/IA thrombolysis*                           | 0.567 (0.347-0.925) | 0.023   |
| Stent-retriever alone                                   | 0.380 (0.236-0.612) | <0.001  |
| Aspiration alone                                        | 2.703 (1.155-6.327) | 0.022   |
| Combined stent-retriever/ aspiration**                  | 0.882 (0.714-1.284) | 0.324   |
| Number of stent-retriever passes, per-1-passes increase | 2.629 (1.633-4.232) | <0.001  |

|                                                                   |                     |        |
|-------------------------------------------------------------------|---------------------|--------|
| Onset to puncture, per-1-min increase                             | 1.000 (0.999-1.001) | 0.710  |
| LNT-to-puncture time (within 6hrs)                                | 0.801 (0.712-1.142) | 0.321  |
| <b>Arterial occlusion site</b>                                    |                     |        |
| Any ICA                                                           | 0.908 (0.502-1.644) | 0.750  |
| MCA                                                               | 0.681 (0.389-1.193) | 0.179  |
| ACA                                                               | 0.748 (0.089-6.291) | 0.789  |
| PCA                                                               | 0.640 (0.345-1.921) | 0.732  |
| V-B                                                               | 1.564 (0.735-3.327) | 0.246  |
| Tandem lesion                                                     | 1.196 (0.654-2.123) | 0.621  |
| <b>Stroke etiology</b>                                            |                     |        |
| Cardioembolic                                                     | reference           |        |
| Large artery atherosclerosis                                      | 1.339 (0.736-2.436) | 0.339  |
| Undetermined or others                                            | 0.829 (0.483-1.427) | 0.500  |
| <b>Stroke risk score</b>                                          |                     |        |
| CHADS <sub>2</sub> score, per-1-score increase                    | 1.556 (1.220-1.985) | <0.001 |
| CHA <sub>2</sub> DS <sub>2</sub> VASc score, per-1-score increase | 1.273 (1.095-1.481) | 0.002  |
| ATRIA score, per-1-score increase                                 | 1.106 (1.032-1.186) | 0.005  |
| Essen score, per-1-score increase                                 | 1.230 (1.030-1.469) | 0.029  |

OR, odd ratio; CI, confidence interval; eGFR, estimated glomerular filtration rate; BMI, body mass index; IA, National Institutes of Health Stroke Scale, NIHSS; tPA, tissue plasminogen activator; IA, intra-arterial; IV, intravenous; LNT, last normal time; ICA, internal carotid artery; MCA, middle cerebral artery; ACA, anterior cerebral artery; PCA, posterior cerebral artery; V-B, vertebrobasilar; \* administration of intravenous tissue plasminogen activator prior to endovascular thrombectomy; \*\*cases in which stent retriever and aspiration were performed simultaneously or sequentially.

**Table S2.** Clinical and imaging characteristics according to the degree of recanalization (Only atrial fibrillation-related stroke)

|                                     | Total<br>(N=224) | Unsuccessful recanalization<br>mTICI ≤2a<br>(N=43) | Successful recanalization<br>mTICI 2b/3 (N=181) | P-value |
|-------------------------------------|------------------|----------------------------------------------------|-------------------------------------------------|---------|
| Age, years, mean (SD)               | 79.7 ± 10.1      | 82.2 ± 9.7                                         | 79.1 ± 10.2                                     | 0.063   |
| Female, (%)                         | 116 (51.8%)      | 23 (53.5%)                                         | 93 (51.4%)                                      | 0.937   |
| BMI (kg/m <sup>2</sup> ), mean (SD) | 20.3 ± 4.1       | 20.0 ± 4.5                                         | 20.3 ± 4.0                                      | 0.697   |
| <b>Vascular risk factors</b>        |                  |                                                    |                                                 |         |
| Hypertension, (%)                   | 175 (78.1%)      | 36 (83.7%)                                         | 139 (76.8%)                                     | 0.434   |
| Diabetes mellitus, (%)              | 128 (57.1%)      | 31 (72.1%)                                         | 97 (53.6%)                                      | 0.042   |
| Hypercholesterolemia, (%)           | 102 (45.5%)      | 17 (39.5%)                                         | 85 (47.0%)                                      | 0.479   |
| Current smoking, (%)                | 21 (9.4%)        | 5 (11.6%)                                          | 16 (8.8%)                                       | 0.785   |
| eGFR < 60 mL/min, (%)               | 128 (57.1%)      | 30 (69.8%)                                         | 98 (54.1%)                                      | 0.091   |
| <b>Comorbidities</b>                |                  |                                                    |                                                 |         |
| Heart failure, (%)                  | 30 (13.4%)       | 10 (23.3%)                                         | 20 (11.1%)                                      | 0.062   |
| Coronary disease, (%)               | 67 (29.9%)       | 8 (18.6%)                                          | 59 (32.6%)                                      | 0.106   |
| Peripheral artery disease, (%)      | 7 (3.1%)         | 3 (7.0%)                                           | 4 (2.2%)                                        | 0.260   |
| Previous infarction, (%)            | 68 (30.4%)       | 13 (30.2%)                                         | 55 (30.4%)                                      | 0.999   |
| Previous hemorrhage, (%)            | 12 (5.4%)        | 4 (9.3%)                                           | 8 (4.4%)                                        | 0.367   |
| <b>Medication before admission</b>  |                  |                                                    |                                                 |         |
| Prior antiplatelet therapy, (%)     | 77 (34.4%)       | 15 (34.9%)                                         | 62 (34.3%)                                      | 0.999   |
| Prior anticoagulant therapy, (%)    | 67 (29.9%)       | 11 (25.6%)                                         | 56 (30.9%)                                      | 0.614   |

|                                                    |               |               |               |        |
|----------------------------------------------------|---------------|---------------|---------------|--------|
| Prior statin therapy, (%)                          | 77 (34.4%)    | 9 (20.9%)     | 68 (37.6%)    | 0.059  |
| Initial NIHSS score, median (IQR)                  | 15 (10-19)    | 17 (12-20.5)  | 15 (10-19)    | 0.020  |
| Change in NIHSS score after 24 hours, median (IQR) | 4 (0-9)       | 0 (-1-2)      | 5 (1-10)      | <0.001 |
| <b>Treatment</b>                                   |               |               |               |        |
| IA thrombolysis without IV tPA, (%)                | 132 (58.9%)   | 30 (69.8%)    | 102 (56.4%)   | 0.151  |
| Combined IV/IA thrombolysis*, (%)                  | 92 (41.1%)    | 13 (30.2%)    | 79 (43.7%)    | 0.151  |
| Stent-retriever alone, (%)                         | 167 (74.6%)   | 22 (51.2%)    | 145 (80.1%)   | <0.001 |
| Aspiration alone, (%)                              | 11 (4.9%)     | 2 (4.7%)      | 9 (5.0%)      | 0.999  |
| Combined stent-retriever/aspiration**, (%)         | 46 (20.5%)    | 19 (44.2%)    | 27 (14.9%)    | <0.001 |
| Number of stent-retriever passes, mean (SD)        | 2.2 ± 1.9     | 3.3 ± 3.0     | 2.0 ± 1.5     | 0.007  |
| Onset to puncture, min, mean (SD)                  | 328.1 ± 297.6 | 327.1 ± 272.2 | 328.4 ± 304.1 | 0.978  |
| LNT-to-puncture time (within 6hrs)                 | 161 (71.9%)   | 32 (74.4%)    | 129 (71.3%)   | 0.823  |
| <b>Arterial occlusion site</b>                     |               |               |               |        |
| Any ICA, (%)                                       | 39 (17.4%)    | 10 (23.3%)    | 29 (16.0%)    | 0.368  |
| MCA, (%)                                           | 63 (28.1%)    | 11 (25.6%)    | 52 (28.7%)    | 0.823  |
| ACA, (%)                                           | 3 (1.3%)      | 1 (2.3%)      | 2 (1.1%)      | 0.999  |
| PCA, (%)                                           | 3 (1.3%)      | 1 (2.3%)      | 2 (1.1%)      | 0.999  |
| V-B, (%)                                           | 14 (6.3%)     | 2 (4.7%)      | 12 (6.6%)     | 0.896  |
| Tandem lesion                                      | 5 (2.2%)      | 2 (4.7%)      | 3 (1.7%)      | 0.490  |
| <b>Laboratory tests</b>                            |               |               |               |        |
| Initial glucose†, mg/dL                            | 137.9 ± 42.2  | 147.1 ± 46.1  | 135.7 ± 41.1  | 0.141  |

|                                                                 |               |              |              |        |
|-----------------------------------------------------------------|---------------|--------------|--------------|--------|
| Fasting glucose‡, mg/dL                                         | 131.8 ± 52.0  | 146.2 ± 50.3 | 128.4 ± 51.9 | 0.044  |
| <b>Pre-admission stroke risk score,<br/>score, median (IQR)</b> |               |              |              |        |
| CHADS <sub>2</sub> score                                        | 2 (2-3)       | 3 (2-3)      | 2 (2-3)      | <0.001 |
| CHA <sub>2</sub> DS <sub>2</sub> VASc score                     | 4 (3-5)       | 5 (4-5.5)    | 4 (3-4)      | 0.003  |
| ATRIA score                                                     | 8 (6.75-9.25) | 9 (7.5-10)   | 8 (6-9)      | 0.033  |
| Essen score                                                     | 4 (3-4)       | 4 (3-4)      | 3 (3-4)      | 0.043  |

mTICI, modified thrombolysis in cerebral infarction; SD, standard deviation; BMI, body mass index; eGFR, estimated glomerular filtration rate; National Institutes of Health Stroke Scale, NIHSS; IQR, interquartile range; IA, intra-arterial; tPA, tissue plasminogen activator; IV, intravenous; LNT, last normal time; ICA, internal carotid artery; MCA, middle cerebral artery; ACA, anterior cerebral artery; PCA, posterior cerebral artery; V-B, vertebro-basilar \* administration of intravenous tissue plasminogen activator prior to endovascular thrombectomy. \*\* cases in which stent retriever and aspiration were performed simultaneously or sequentially. † The glucose level test performed at the time of first admission to the emergency room. ‡ The glucose level test performed after 8 hours of fasting after admission.

**Table S3.** Multivariate analysis for stroke risk score associated with the unsuccessful recanalization among atrial fibrillation-related stroke with endovascular thrombectomy.

| Variables                                                     | <b>CHADS<sub>2</sub></b> |                 | <b>CHA<sub>2</sub>DS<sub>2</sub>VASc</b> |                 | <b>ATRIA</b>        |                 | <b>Essen</b>        |                 |
|---------------------------------------------------------------|--------------------------|-----------------|------------------------------------------|-----------------|---------------------|-----------------|---------------------|-----------------|
|                                                               | OR (95% CI)              | <i>p</i> -value | OR (95% CI)                              | <i>p</i> -value | OR (95% CI)         | <i>p</i> -value | OR (95% CI)         | <i>p</i> -value |
| BMI,<br>per-1-kg/m <sup>2</sup> increase                      | 0.998 (0.911-1.092)      | 0.958           | 1.014 (0.926-1.110)                      | 0.770           | 1.021 (0.928-1.123) | 0.668           | 0.985 (0.898-1.081) | 0.756           |
| Coronary disease                                              | 0.470 (0.191-1.156)      | 0.100           | 0.493 (0.202-1.202)                      | 0.120           | 0.476 (0.195-1.165) | 0.104           | 0.274 (0.098-0.771) | 0.014           |
| Initial NIHSS score,<br>per 1-score increase                  | 1.013 (0.949-1.081)      | 0.697           | 1.016 (0.953-1.083)                      | 0.634           | 1.009 (0.947-1.076) | 0.782           | 1.014 (0.951-1.081) | 0.679           |
| <b>IV thrombolysis</b>                                        |                          |                 |                                          |                 |                     |                 |                     |                 |
| IA thrombolysis<br>without IV tPA                             | Reference                |                 | Reference                                |                 | Reference           |                 | Reference           |                 |
| Combined IA/IV<br>thrombolysis*                               | 0.798 (0.331-1.927)      | 0.617           | 0.781 (0.324-1.879)                      | 0.581           | 0.831 (0.341-2.020) | 0.682           | 0.749 (0.313-1.793) | 0.517           |
| <b>EVT parameters</b>                                         |                          |                 |                                          |                 |                     |                 |                     |                 |
| Stent-retriever alone                                         | 0.220 (0.100-0.483)      | <0.001          | 0.233 (0.106-0.511)                      | <0.001          | 0.216 (0.100-0.469) | <0.001          | 0.221 (0.101-0.482) | <0.001          |
| Aspiration alone                                              | 0.489 (0.080-2.999)      | 0.439           | 0.566 (0.093-3.426)                      | 0.535           | 0.553 (0.094-3.267) | 0.513           | 0.481(0.080-2.887)  | 0.423           |
| Number of<br>stent-retriever passes,<br>per-1-passes increase | 1.357 (1.132-1.626)      | 0.001           | 1.375 (1.146-1.649)                      | <0.001          | 1.376 (1.149-1.648) | <0.001          | 1.346 (1.126-1.609) | 0.001           |
| Onset to puncture,<br>per 1-min increase                      | 1.000 (0.998-1.001)      | 0.377           | 0.999 (0.998-1.001)                      | 0.394           | 0.999 (0.998-1.001) | 0.369           | 0.999 (0.998-1.001) | 0.391           |
| <b>Risk scoring score</b>                                     |                          |                 |                                          |                 |                     |                 |                     |                 |
| Per-1-point increase                                          | 1.787 (1.173-2.725)      | 0.007           | 1.354 (1.049-1.747)                      | 0.020           | 1.132 (1.000-1.281) | 0.051           | 1.635 (1.093-2.448) | 0.017           |

OR, odds ratio; CI, confidence interval; BMI, body mass index; National Institutes of Health Stroke Scale, NIHSS; IV, intravenous; IA, intra-arterial; tPA, tissue plasminogen activator; EVT, endovascular thrombectomy; \* administration of intravenous tissue plasminogen activator prior to endovascular thrombectomy.

**Table S4.** Comparison of the area under curve (AUC) of each stroke risk score by two. (Univariate ROC analysis)

| AUC1 vs. AUC2                                                            | AUC1  | AUC2  | <i>p</i> -value |
|--------------------------------------------------------------------------|-------|-------|-----------------|
| CHADS <sub>2</sub> score vs. CHA <sub>2</sub> DS <sub>2</sub> VASc score | 0.618 | 0.602 | 0.233           |
| CHA <sub>2</sub> DS <sub>2</sub> VASc score vs. ATRIA score              | 0.602 | 0.605 | 0.880           |
| ATRIA score vs. Essen score                                              | 0.605 | 0.569 | 0.167           |
| CHADS <sub>2</sub> score vs. ATRIA score                                 | 0.618 | 0.605 | 0.598           |
| CHADS <sub>2</sub> score vs. Essen score                                 | 0.618 | 0.569 | 0.002           |
| CHA <sub>2</sub> DS <sub>2</sub> VASc score vs. Essen score              | 0.602 | 0.569 | 0.099           |

AUC, the area under the curve; ROC, receiver operating characteristic

**Table S5.** Comparison of area under the curve (AUC) of each stroke risk score by two in AF-related stroke. (Univariate ROC analysis)

| AUC1 vs. AUC2                                                            | AUC1  | AUC2  | <i>p</i> -value |
|--------------------------------------------------------------------------|-------|-------|-----------------|
| CHADS <sub>2</sub> score vs. CHA <sub>2</sub> DS <sub>2</sub> VASc score | 0.666 | 0.643 | 0.260           |
| CHA <sub>2</sub> DS <sub>2</sub> VASc score vs. Atria score              | 0.643 | 0.603 | 0.254           |
| ATRIA score vs. Essen score                                              | 0.603 | 0.595 | 0.843           |
| CHADS <sub>2</sub> score vs. ATRIA score                                 | 0.666 | 0.603 | 0.102           |
| CHADS <sub>2</sub> score vs. Essen score                                 | 0.666 | 0.595 | 0.006           |
| CHA <sub>2</sub> DS <sub>2</sub> VASc score vs. Essen score              | 0.643 | 0.595 | 0.156           |

AUC, area under curve; AF, atrial fibrillation; ROC, receiver operating characteristic

**Table S6.** Receiver-operating characteristics curve analysis (area under curve), net reclassification improvement, and integrated discrimination improvement of predictive models for unsuccessful recanalization in endovascular thrombectomy patients.

|                                  | <b>Model*</b>             | <b>Model +<br/>CHADS<sub>2</sub></b> | <b>Model +<br/>CHA<sub>2</sub>DS<sub>2</sub>VASc</b> | <b>Model +<br/>ATRIA</b>  | <b>Model +<br/>Essen</b>  | <b><i>p</i>**</b> | <b><i>p</i><sup>†</sup></b> | <b><i>p</i><sup>‡</sup></b> | <b><i>p</i><sup>§</sup></b> |
|----------------------------------|---------------------------|--------------------------------------|------------------------------------------------------|---------------------------|---------------------------|-------------------|-----------------------------|-----------------------------|-----------------------------|
| ROC curve (AUC)                  | 0.717<br>(0.659 to 0.775) | 0.727<br>(0.669 to 0.785)            | 0.722<br>(0.664 to 0.780)                            | 0.723<br>(0.664 to 0.782) | 0.730<br>(0.672 to 0.789) | 0.376             | 0.596                       | 0.528                       | 0.295                       |
| Category-based NRI<br>(95% CI)   |                           | 5.3<br>(-1.1 to 11.6)                | 4.6<br>(-1.4 to 10.7)                                | 0.9<br>(-4 to 5.7)        | 3.1<br>(-2.6 to 8.7)      | 0.107             | 0.132                       | 0.731                       | 0.292                       |
| Continuous-based NRI<br>(95% CI) |                           | 30.6<br>(8.5 to 52.7)                | 29.4<br>(7.4 to 51.4)                                | 23.8<br>(1.7 to 45.9)     | 32.1<br>(10.2 to 54)      | 0.007             | 0.009                       | 0.035                       | 0.004                       |
| Relative IDI<br>(95% CI)         |                           | 1.6<br>(0.3 to 2.9)                  | 1.7<br>(0.2 to 3.2)                                  | 1.4<br>(0.3 to 2.5)       | 1.4<br>(0 to 2.8)         | 0.014             | 0.024                       | 0.015                       | 0.054                       |

ROC, receiver-operating characteristics; AUC, area under the curve; NRI, net reclassification improvement; CI, confidence interval; IDI, integrated discrimination improvement; \*Model included BMI, diabetes mellitus, coronary disease, initial NIHSS score, tPA use, stent-retriever alone, aspiration alone, the number of stent-retriever passes, and onset to puncture time. \*\*Comparison between Model and Model + CHADS<sub>2</sub>. <sup>†</sup> Comparison between Model and Model + CHA<sub>2</sub>DS<sub>2</sub>VASc. <sup>‡</sup> Comparison between Model and Model + ATRIA. <sup>§</sup> Comparison between Model and Model + Essen
